# Supplementary material
Source: Springer Nature journal article supplement (https://www.springermedizin.de/resource/supplementary/13024_2011_351_MOESM7_ESM.pdf/9643756)

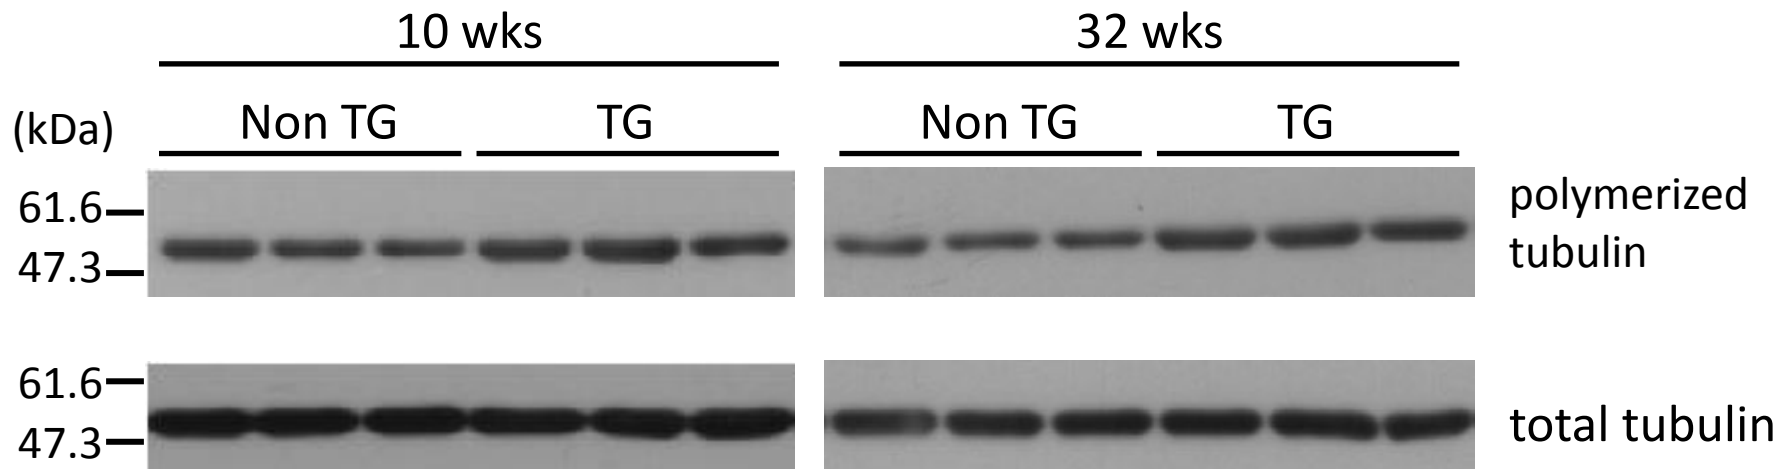

WB:  $\beta$ III-tubulin

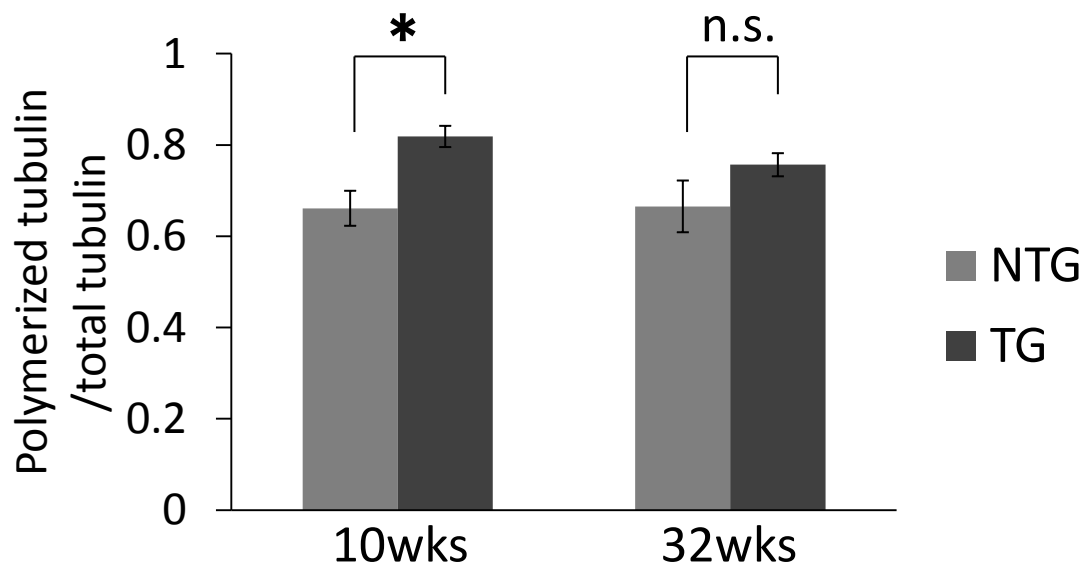

Supplement: MOESM7 [file 9643756]
